# Supplementary material
Source: PubMed Central journal article supplement (PMC3120092)
Supplement: supp_data.pdf [file supp_data.pdf]

## Supplementary Data

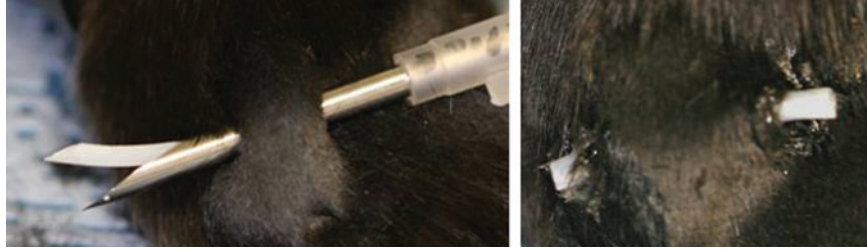

**SUPPLEMENTARY FIG. S1.** Hollow fiber insertion. After subcutaneous 500  $\mu$ L injection of Matrigel, a 14G needle is threaded such that the fiber extends through the gel plug and both ends protrude out through the skin. Specifically, a 14G needle is used as a conduit for the cellulose hollow fiber (left). Once the fiber is inserted into the 14G needle, the needle is removed, leaving the hollow fiber embedded in the Matrigel plug (right).
